# Supplementary material
Source: PubMed Central journal article supplement (PMC6792350)
Supplement: ehp-127-077005-s001.pdf [file ehp-127-077005-s001.pdf]

**Note to readers with disabilities:** *EHP* strives to ensure that all journal content is accessible to all readers. However, some figures and Supplemental Material published in *EHP* articles may not conform to [508 standards](#) due to the complexity of the information being presented. If you need assistance accessing journal content, please contact [ehp508@niehs.nih.gov](mailto:ehp508@niehs.nih.gov). Our staff will work with you to assess and meet your accessibility needs within 3 working days.

### **Supplemental Material**

#### **Oral Systemic Bioavailability of Bisphenol A and Bisphenol S in Pigs**

Véronique Gayraud, Marlène Z. Lacroix, Flore C. Grandin, Séverine H. Collet, Hanna Mila, Catherine Viguié, Clémence A. Gély, Blandine Rabozzi, Michèle Bouchard, Roger Léandri, Pierre-Louis Toutain, and Nicole Picard-Hagen

#### **Table of Contents**

**Table S1.** Concentrations of BPA, BPS and BPSG in the dosing solutions.

**Table S2.** Limits of quantification (LOQ) of BPA, BPAG, BPS and BPSG ( $\mu\text{M}$ ).

**Table S3.** Typical values for the population primary parameters of BPA and BPAG in pigs as obtained with a 9-compartment model.

**Table S4.** Typical values for the population primary parameters of BPS and BPSG in pigs as obtained with a 9-compartment model.

**Table S5.** Bootstrap estimates of the random variance parameters (diagonal variance-covariance matrix) and BSV for the structural parameters of the BPA toxicokinetic model for which the shrinkage of random effects was lower than 30%.

**Table S6.** Bootstrap estimates of the random variance parameters (diagonal variance-covariance matrix) and BSV for the structural parameters of the BPS toxicokinetic model for which the shrinkage of random effects was lower than 30%.

**Figure S1. Diagnostic plots of the population and individual model predicted vs observed BPA and BPAG plasma concentrations.** A1 and B1: Population predicted vs. observed BPA plasma concentrations ( $\mu\text{M}$ ) after respective BPA IV (A1) and oral administrations (B1); C1 and D1: Population predicted vs. observed BPAG plasma concentrations ( $\mu\text{M}$ ) after respective BPA IV (C1) and oral (D1) administrations; A2 and B2: Individual predicted vs. observed BPA plasma concentrations ( $\mu\text{M}$ ) after respective BPA IV (A2) and oral administrations (B2); C2 and D2: Individual predicted vs. observed BPAG plasma concentrations ( $\mu\text{M}$ ) after respective BPA IV (C2) and oral (D2) administrations.

**Figure S2. Diagnostic plots of the population and individual model predicted vs observed BPS and BPSG plasma concentrations.** A1 and B1: Population predicted vs. observed BPS plasma concentrations ( $\mu\text{M}$ ) after respective BPS IV (A1) and oral administrations (B1); C1 and D1: Population predicted vs. observed BPSG plasma concentrations ( $\mu\text{M}$ ) after respective IV administrations of BPS (C1) and BPSG (D1); A2 and B2: Individual predicted vs. observed BPS plasma concentrations ( $\mu\text{M}$ ) after respective BPS IV (A2) and oral administrations (B2); C2 and D2: Individual predicted vs. observed BPSG plasma concentrations ( $\mu\text{M}$ ) after respective IV administrations of BPS (C2) and BPSG (D2).

**Figure S3. Diagnostic plots of the population and individual model predicted vs observed cumulative amounts of BPA and BPAG excreted in urine.** A1 and B1: Population predicted vs. observed cumulative amounts ( $\mu\text{moles/kg}$ ) of BPA (A1) and BPAG (B1) excreted in urine after BPA IV administration; C1: Population predicted vs. observed cumulative amounts of BPAG excreted in urine after BPA oral administration; A2 and B2: Individual predicted vs. observed cumulative amounts of BPA (A2) and BPAG (B2) excreted in urine after BPA IV administration; C2: Individual predicted vs. observed cumulative amounts of BPAG excreted in urine after BPA oral administration.

**Figure S4. Diagnostic plots of the population and individual model predicted vs observed cumulative amounts of BPS and BPSG excreted in urine after IV dosing.** A1 and B1: Population predicted vs. observed cumulative amounts ( $\mu\text{moles/kg}$ ) of BPS (A1) and BPSG (B1) excreted in urine after BPS IV administration; C1: Population predicted vs. observed cumulative amounts ( $\mu\text{moles/kg}$ ) of BPSG excreted in urine after BPSG IV administration; A2 and B2: Individual predicted vs. observed cumulative amounts ( $\mu\text{moles/kg}$ ) of BPS (A2) and BPSG (B2) excreted in urine after BPS IV administration; C2: Individual predicted vs. observed cumulative amounts ( $\mu\text{moles/kg}$ ) of BPSG excreted in urine after IV BPSG administration.

**Figure S5. Diagnostic plots of the population and individual model predicted vs observed cumulative amounts of BPS and BPSG excreted in urine after oral dosing.** A1 and B1: Population predicted vs. observed cumulative amounts ( $\mu\text{moles/kg}$ ) of BPS (A1) and BPSG (B1) excreted in urine after BPS oral administration; A2 and B2: Individual predicted vs. observed cumulative amounts ( $\mu\text{moles/kg}$ ) of BPS (A2) and BPSG (B2) excreted in urine after BPS oral administration.

**Figure S6. Visual Predictive Check (VPC) of plasma BPA and BPAG concentrations obtained with 200 replicates of each animal.** A and B: Plasma BPA concentrations ( $\mu\text{M}$ ) after respective BPA IV (A) and oral administrations. C and D: Plasma BPAG concentrations ( $\mu\text{M}$ ) after respective BPA IV (C) and oral administrations (D) Red lines: observed quantiles (20, 50 and 80%); Black lines: predicted quantiles by Monte Carlo Simulation (20, 50 and 80%); Black symbols: observed data. When the model ideally predicts the data, the observed and predicted quantiles are expected to be superimposed.

**Figure S7. Visual Predictive Check (VPC) of the amounts of BPA and BPAG excreted in urine obtained with 200 replicates of each animal.** A: Amounts of BPA excreted in urine ( $\mu\text{M}$ ) after BPA IV administration; B and C: Amounts of BPAG excreted in urine ( $\mu\text{M}$ ) after respective BPA IV and oral administrations. Red lines: observed quantiles (20, 50 and 80%); Black lines: predicted quantiles by Monte Carlo Simulation (20, 50 and 80%); Black symbols: observed data. When the model ideally predicts the data, the observed and predicted quantiles are expected to be superimposed.

**Figure S8. Visual Predictive Check (VPC) of plasma BPS and BPSG concentrations obtained with 1000 replicates of each animal.** A and B: Plasma BPS concentrations ( $\mu\text{M}$ ) after respective BPS IV (A) and oral administrations. C and D: Plasma BPSG concentrations ( $\mu\text{M}$ ) after respective IV BPSG (C) and BPS administrations (D). Red lines: observed quantiles (20, 50 and 80%); Black lines: predicted quantiles by Monte Carlo Simulation (20, 50 and 80%); Black symbols: observed data. When the model ideally predicts the data, the observed and predicted quantiles are expected to be superimposed.

**Figure S9. Visual Predictive Check (VPC) of the amounts of BPS and BPSG excreted in urine obtained with 1000 replicates of each animal.** A and B: Amounts of BPS excreted in urine ( $\mu\text{M}$ ) after respective BPS IV (A) and oral (B) administrations; C and D: Amounts of BPSG excreted in urine ( $\mu\text{M}$ ) after respective BPS IV (C) and oral (D) administrations. E: Amounts of BPSG excreted in urine ( $\mu\text{M}$ ) after BPSG IV administration. Red lines: observed quantiles (20, 50 and 80%); Black lines: predicted quantiles by Monte Carlo Simulation (20, 50 and 80%); Black symbols: observed data. When the model ideally predicts the data, the observed and predicted quantiles are expected to be superimposed.

**Table S1: Concentrations of BPA, BPS and BPSG in the dosing solutions.**

| Experiment                      | Exp1       |            | Exp2 | Exp3 |      | Exp4 |      | Exp5       |            |            |            |
|---------------------------------|------------|------------|------|------|------|------|------|------------|------------|------------|------------|
| Molecule                        | BPA        |            | BPA  | BPS  | BPSG | BPS  |      | BPA        |            | BPS        |            |
| Route                           | IV         | Oral       | IV   | IV   | IV   | IV   | Oral | IV         | Oral       | IV         | Oral       |
| Nominal concentration (mg/ml)   | 50         | 100        | 50   | 25   | 10   | 25   |      | 23         | 25         | 50         | 25         |
| Measured concentration (mg/ml)* | 59.1, 63.4 | 68.4, 93.8 | 49.3 | 26.8 | 9.8  | 21.3 | NM   | 18.2, 18.9 | 18.7, 24.0 | 39.3, 42.9 | 17;1; 18.1 |

\*Separate dosing solutions have been prepared for each of the periods of the experiments 1 and 5

BPA: Bisphenol A; BPS: Bisphenol S; BPSG: Bisphenol S glucuronide, Exp: Experiment, IV: Intravenous, NM: Not measured.

**Table S2: Limits of quantification (LOQ) of BPA, BPAG, BPS and BPSG ( $\mu\text{M}$ ).**

|      | Exp1   |       | Exp2   |       | Exp3   |       | Exp4   |       | Exp5   |       |
|------|--------|-------|--------|-------|--------|-------|--------|-------|--------|-------|
|      | Plasma | Urine |
| BPA  | 0.0044 |       | 0.0044 | 0.044 |        |       |        |       | 0.013  | 0.11  |
| BPAG | 0.049  |       | 0.012  | 2.47  |        |       |        |       | 0.074  | 2.47  |
| BPS  |        |       |        |       | 0.012  | 0.40  | 0.012  | 0.40  | 0.012  | 0.40  |
| BPSG |        |       |        |       | 0.023  | 0.23  | 0.023  | 0.23  | 0.023  | 0.23  |

The LOQ values were determined for plasma and urine with a precision lower than 20 % and within an accuracy range of 80-120 %

BPA: Bisphenol A; BPAG: Bisphenol A glucuronide; BPS: Bisphenol S; BPSG: Bisphenol S glucuronide, Exp: Experiment.

**Table S3: Typical values for the population primary parameters of BPA and BPAG in pigs as obtained with a 9-compartments model.**

| <b>Parameters (units)</b>              | <b>Mean</b> | <b>Median</b> | <b>SE</b> | <b>CV%</b> |
|----------------------------------------|-------------|---------------|-----------|------------|
| tvVBPA (L/kg)                          | 1.03        | 1.00          | 0.471     | 47.30      |
| tvK34 (1/h)                            | 5.90        | 4.14          | 5.207     | 126        |
| tvK43 (1/h)                            | 3.89        | 3.68          | 1.347     | 36.61      |
| tvK30 (1/h)                            | 0.0026      | 0.002         | 0.001     | 57.70      |
| tvVBPAG (L/kg)                         | 0.107       | 0.112         | 0.026     | 23.17      |
| tvK56 (1/h)                            | 1.45        | 1.45          | 0.186     | 12.86      |
| tvK65 (1/h)                            | 0.015       | 0.015         | 0.002     | 10.99      |
| tvK32 (1/h)                            | 3.72        | 3.31          | 1.467     | 44.36      |
| tvK23 (1/h)                            | 1.53        | 1.32          | 1.346     | 102        |
| tvK25 (1/h)                            | 137.08      | 91.87         | 117.08    | 127        |
| tvK12 (1/h)                            | 0.365       | 0.371         | 0.062     | 16.67      |
| tvK10 (1/h)                            | 0.223       | 0.219         | 0.077     | 35.36      |
| tvK110 (1/h)                           | 0.349       | 0.318         | 0.150     | 47.23      |
| tvK105 (1/h)                           | 0.207       | 0.217         | 0.030     | 13.99      |
| tvK50 (1/h)                            | 2.750       | 2.547         | 0.743     | 29.16      |
| tvCMultStdevBPA Plasma                 | 0.410       | 0.407         | 0.058     | 14.28      |
| tvCMultStdevBPAG Plasma                | 0.459       | 0.461         | 0.015     | 3.35       |
| tvCMultStdevBPA URINE                  | 0.484       | 0.485         | 0.052     | 10.72      |
| tvCMultStdevBPAG URINE                 | 0.295       | 0.308         | 0.078     | 25.23      |
| stdev0 (BPA plasma) $\mu\text{mol/L}$  | 0.0093      | 0.008         | 0.004     | 47.49      |
| stdev1 (BPAG plasma) $\mu\text{mol/L}$ | 0.0002      | 0.000         | 0.000     | 1195       |
| stdev2 (urine BPA) $\mu\text{mol/kg}$  | 0.00005     | 0.000         | 0.000     | 212        |
| stdev3 (urine BPAG) $\mu\text{mol/kg}$ | 0.9679      | 0.026         | 2.215     | 8539       |

BPA: Bisphenol A

BPAG: Bisphenol A glucuronide

The bootstrap procedure was used to estimate the mean, median, standard error (SE) and coefficient of variation (CV%) of the parameter estimates.

VBPA: volume of the BPA central compartment

VBPAG: volume of the BPAG central compartment

K10: rate constant corresponding to the unabsorbed BPA from the gastrointestinal tract

K12: rate constant of BPA absorbed by the enterocytes passing directly into the portal blood

K23, K32, K34, K43: Distribution rate constants between the plasma and the peripheral compartments for BPA.

K25, K56 and K65: Distribution rate constants between the plasma and the peripheral compartments for BPAG.

K30: BPA elimination rate constant from plasma to urine

K50: BPAG elimination rate constant from plasma to urine

K110: rate constant of BPA absorbed by the enterocytes locally subjected to glucuronidation

K105: rate constant of BPAG formed by the enterocytes absorbed into the systemic circulation

MultStdevBPA Plasma: standard deviation of the multiplicative error term  $\varepsilon_1$  for BPA plasma concentrations (expressed as a coefficient of variation)

MultStdevBPAG Plasma: standard deviation of the multiplicative error term  $\varepsilon_1$  for BPAG plasma concentrations (expressed as a coefficient of variation)

MultStdevBPA URINE: standard deviation of the multiplicative error term  $\varepsilon_1$  for BPA urine amount (expressed as a coefficient of variation)

MultStdevBPAG URINE: standard deviation of the multiplicative error term  $\varepsilon_1$  for BPAG urine amount (expressed as a coefficient of variation)

Stdev0: standard deviation of the additive error term  $\varepsilon_2$  for BPA plasma concentrations

Stdev1: standard deviation of the additive error term  $\varepsilon_2$  for BPAG plasma concentrations

Stdev2: standard deviation of the additive error term  $\varepsilon_2$  for BPA urinary amount

Stdev3: standard deviation of the additive error term  $\varepsilon_2$  for BPAG urinary amount

**Table S4: Typical values for the population primary parameters of BPS and BPSG in pigs as obtained with a 9-compartments model.**

| <b>Parameters (units)</b>              | <b>Mean</b> | <b>Median</b> | <b>SE</b> | <b>CV%</b> |
|----------------------------------------|-------------|---------------|-----------|------------|
| tvVBPS (L/kg)                          | 0.301       | 0.302         | 0.053     | 17.59      |
| tvK34 (1/h)                            | 0.270       | 0.267         | 0.040     | 14.87      |
| tvK43 (1/h)                            | 0.519       | 0.512         | 0.071     | 13.67      |
| tvK30 (1/h)                            | 0.001       | 0.001         | 0.0004    | 30.62      |
| tvVBPSG (L/kg)                         | 0.135       | 0.137         | 0.019     | 14.08      |
| tvK56 (1/h)                            | 0.730       | 0.655         | 0.232     | 31.73      |
| tvK65 (1/h)                            | 0.006       | 0.006         | 0.0019    | 33.29      |
| tvK32 (1/h)                            | 7.119       | 7.091         | 2.193     | 30.81      |
| tvK23 (1/h)                            | 84.0        | 83.489        | 13.1      | 15.58      |
| tvK25 (1/h)                            | 66.6        | 62.147        | 21.6      | 32.38      |
| tvK12 (1/h)                            | 2.042       | 1.425         | 1.944     | 95.20      |
| tvK10 (1/h)                            | 0.018       | 0.018         | 0.0032    | 17.50      |
| tvK110 (1/h)                           | 0.000       | 0.000         | 0.0000    | 11.60      |
| tvK105 (1/h)                           | 0.534       | 0.523         | 0.064     | 11.97      |
| tvK50 (1/h)                            | 1.818       | 1.832         | 0.180     | 9.90       |
| tvCMultStdevBPS                        | 0.460       | 0.465         | 0.031     | 6.76       |
| tvCMultStdevBPSG                       | 0.386       | 0.373         | 0.064     | 16.45      |
| tvCMultStdevBPSURINE                   | 0.738       | 0.742         | 0.102     | 13.80      |
| tvCMultStdevBPSGURINE                  | 0.399       | 0.393         | 0.043     | 10.78      |
| stdev0 (BPS plasma) $\mu\text{mol/L}$  | 0.035       | 0.039         | 0.016     | 44.64      |
| stdev1 (BPSG plasma) $\mu\text{mol/L}$ | 0.223       | 0.246         | 0.120     | 53.84      |
| stdev2 (urine BPS) $\mu\text{mol/kg}$  | 0.0000      | 0.0000        | 0.0000    | 0.0000     |
| stdev3 (urine BPSG) $\mu\text{mol/kg}$ | 0.0062      | 0.0062        | 0.0000    | 0.0057     |

BPS: Bisphenol S

BPSG: Bisphenol S glucuronide

The bootstrap procedure was used to estimate the mean, median, standard error (SE) and coefficient of variation (CV%).

VBPS: volume of the BPS central compartment

VBPSG: volume of the BPSG central compartment

K10: rate constant corresponding to the unabsorbed BPS from the gastrointestinal tract

K12: rate constant of BPS absorbed by the enterocytes passing directly into the portal blood

K23, K32, K34, K43: Distribution rate constants between the plasma and the peripheral compartments for BPS.

K25, K56 and K65: Distribution rate constants between the plasma and the peripheral compartments for BPSG.

K30: BPS elimination rate constant from plasma to urine

K50: BPSG elimination rate constant from plasma to urine

K110: rate constant of BPS absorbed by the enterocytes locally subjected to glucuronidation

K105: rate constant of BPSG formed by the enterocytes absorbed into the systemic circulation

MultStdevBPS: standard deviation of the multiplicative error term  $\varepsilon_1$  for BPS plasma concentrations (expressed as a coefficient of variation)

MultStdevBPSG: standard deviation of the multiplicative error term  $\varepsilon_1$  for BPSG plasma concentrations (expressed as a coefficient of variation)

MultStdevBPSURINE: standard deviation of the multiplicative error term  $\varepsilon_1$  for BPS urine amount (expressed as a coefficient of variation)

MultStdevBPSGURINE: standard deviation of the multiplicative error term  $\varepsilon_1$  for BPSG urine amount (expressed as a coefficient of variation)

Stdev0: standard deviation of the additive error term  $\varepsilon_2$  for BPS plasma concentrations

Stdev1: standard deviation of the additive error term  $\varepsilon_2$  for BPSG plasma concentrations

Stdev2: standard deviation of the additive error term  $\varepsilon_2$  for BPSA urinary amount

Stdev3: standard deviation of the additive error term  $\varepsilon_2$  for BPSG urinary amount

**Table S5: Bootstrap estimates of the random variance parameters (diagonal variance-covariance matrix) and BSV for the structural parameters of the BPA toxicokinetic model for which the shrinkage of random effects was lower than 30%.**

| Label            | nK12  | nK30 | nK25 | nK23  | nVBPA | nVBPAG | nK50 |
|------------------|-------|------|------|-------|-------|--------|------|
| <b>Omega</b>     |       |      |      |       |       |        |      |
| <b>nK12</b>      | 0.325 |      |      |       |       |        |      |
| <b>nK30</b>      |       | 1.42 |      |       |       |        |      |
| <b>nK25</b>      |       |      | 1.14 |       |       |        |      |
| <b>nK23</b>      |       |      |      | 0.034 |       |        |      |
| <b>nVBPA</b>     |       |      |      |       | 0.117 |        |      |
| <b>nVBPAG</b>    |       |      |      |       |       | 0.883  |      |
| <b>nK50</b>      |       |      |      |       |       |        | 1.67 |
| <b>BSV (CV%)</b> | 62    | 177  | 146  | 19    | 35    | 119    | 207  |

BSV: Between Subject Variability

BPA: Bisphenol A

BPAG: Bisphenol A glucuronide

CV: coefficient of variation

nVBPA: volume of the BPA central compartment

nVBPAG: volume of the BPAG central compartment

nK12: rate constant of BPA absorbed by the enterocytes passing directly into the portal blood

nK23: distribution rate constant between the liver and the plasma for BPA.

nK25: distribution rate constant between the liver and the plasma for BPAG.

nK30: BPA elimination rate constant from plasma to urine

nK50: BPAG elimination rate constant from plasma to urine

**Table S6: Bootstrap estimates of the random variance parameters (diagonal variance-covariance matrix) and BSV for the structural parameters of the BPS toxicokinetic model for which the shrinkage of random effects was lower than 30%.**

| Label            | nK12   | nK30   | nK25  | nK23  | nVBPS | nVBPSG | nK50  |
|------------------|--------|--------|-------|-------|-------|--------|-------|
| <b>Omega</b>     |        |        |       |       |       |        |       |
| <b>nK12</b>      | 1.985  |        |       |       |       |        |       |
| <b>nK30</b>      |        | 0.707  |       |       |       |        |       |
| <b>nK25</b>      |        |        | 0.362 |       |       |        |       |
| <b>nK23</b>      |        |        |       | 0.345 |       |        |       |
| <b>nVBPS</b>     |        |        |       |       | 0.202 |        |       |
| <b>nVBPSG</b>    |        |        |       |       |       | 0.214  |       |
| <b>nK50</b>      |        |        |       |       |       |        | 0.212 |
| <b>BSV (CV%)</b> | 250.61 | 101.34 | 66.04 | 64.16 | 47.30 | 48.91  | 48.65 |

BSV: Between Subject Variability

BPS: Bisphenol S

BPSG: Bisphenol S glucuronide

CV: Coefficient of variation

nVBPS: volume of the BPS central compartment

nVBPSG: volume of the BPSG central compartment

nK12: rate constant of BPS absorbed by the enterocytes passing directly into the portal blood

nK23: distribution rate constant between the liver and the plasma for BPS.

nK25: distribution rate constant between the liver and the plasma for BPSG.

nK30: BPS elimination rate constant from plasma to urine

nK50: BPSG elimination rate constant from plasma to urine



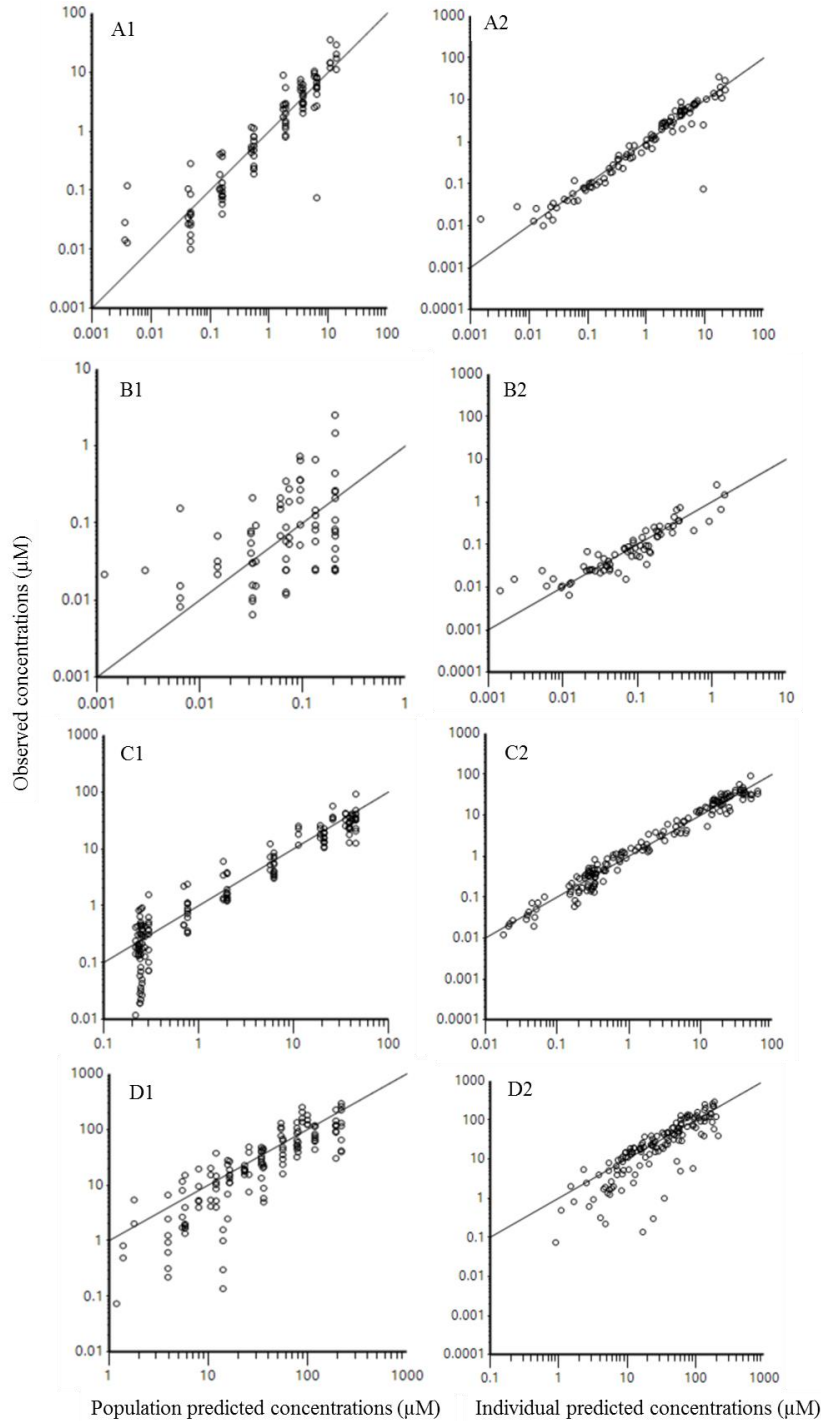

**Figure S1: Diagnostic plots of the population and individual model predicted vs observed BPA and BPAG plasma concentrations.** A1 and B1: Population predicted vs. observed BPA plasma concentrations ( $\mu\text{M}$ ) after respective BPA IV (A1) and oral administrations (B1); C1 and D1: Population predicted vs. observed BPAG plasma concentrations ( $\mu\text{M}$ ) after respective BPA IV (C1) and oral (D1) administrations; A2 and B2: Individual predicted vs. observed BPA plasma concentrations ( $\mu\text{M}$ ) after respective BPA IV (A2) and oral administrations (B2); C2 and D2: Individual predicted vs. observed BPAG plasma concentrations ( $\mu\text{M}$ ) after respective BPA IV (C2) and oral (D2) administrations.

BPA: Bisphenol A; BPAG: Bisphenol A glucuronide; IV: Intravenous

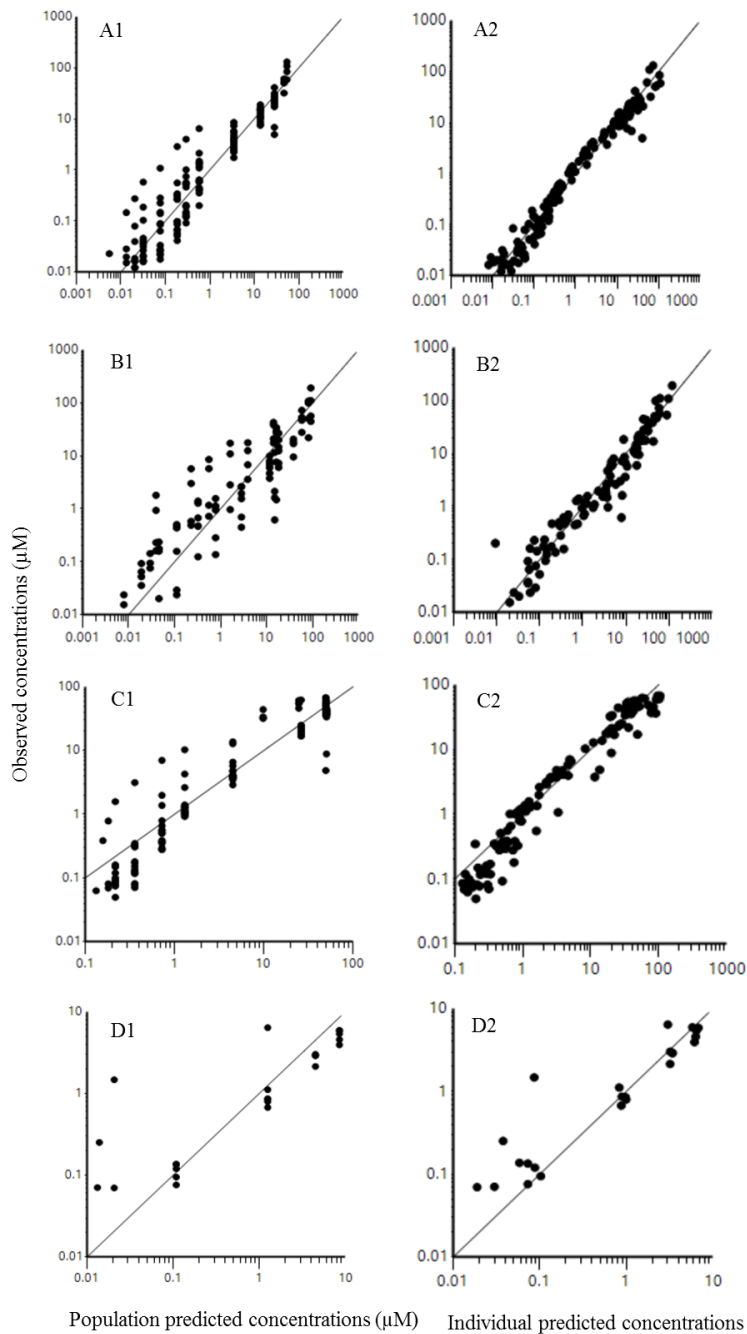

**Figure S2: Diagnostic plots of the population and individual model predicted vs observed BPS and BPSG plasma concentrations.** A1 and B1: Population predicted vs. observed BPS plasma concentrations ( $\mu\text{M}$ ) after respective BPS IV (A1) and oral administrations (B1); C1 and D1: Population predicted vs. observed BPSG plasma concentrations ( $\mu\text{M}$ ) after respective IV administrations of BPS (C1) and BPSG (D1); A2 and B2: Individual predicted vs. observed BPS plasma concentrations ( $\mu\text{M}$ ) after respective BPS IV (A2) and oral administrations (B2); C2 and D2: Individual predicted vs. observed BPSG plasma concentrations ( $\mu\text{M}$ ) after respective IV administrations of BPS (C2) and BPSG (D2).  
 BPS: Bisphenol S; BPSG: Bisphenol S glucuronide; IV: Intravenous.

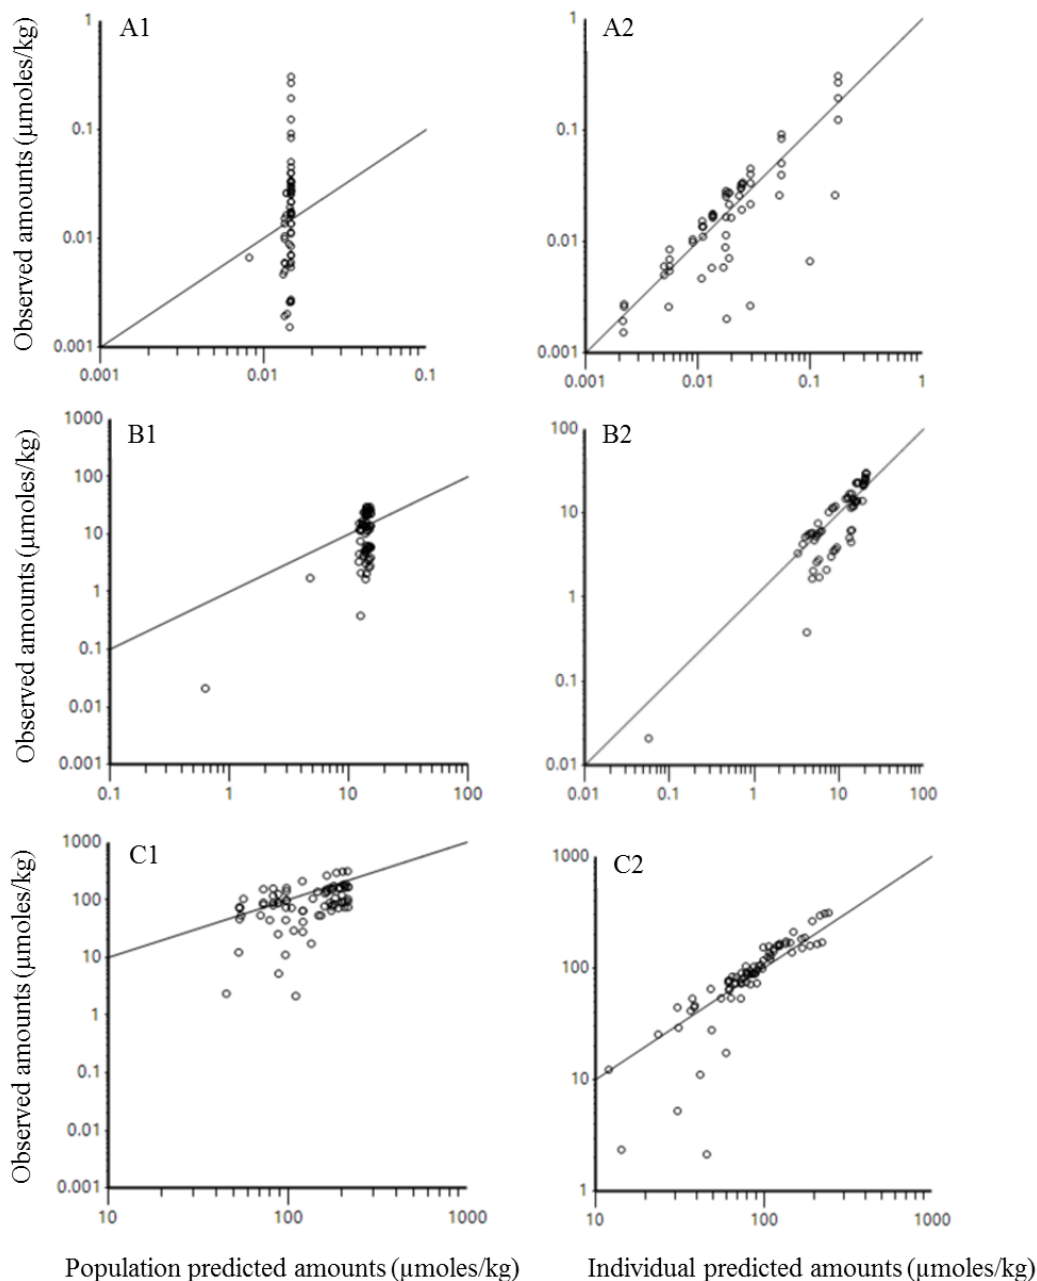

**Figure S3: Diagnostic plots of the population and individual model predicted vs observed cumulative amounts of BPA and BPAG excreted in urine.** A1 and B1: Population predicted vs. observed cumulative amounts (μmoles/kg) of BPA (A1) and BPAG (B1) excreted in urine after BPA IV administration; C1: Population predicted vs. observed cumulative amounts of BPAG excreted in urine after BPA oral administration; A2 and B2: Individual predicted vs. observed cumulative amounts of BPA (A2) and BPAG (B2) excreted in urine after BPA IV administration; C2: Individual predicted vs. observed cumulative amounts of BPAG excreted in urine after BPA oral administration.

BPA: Bisphenol A; BPAG: Bisphenol A glucuronide; IV: Intravenous.

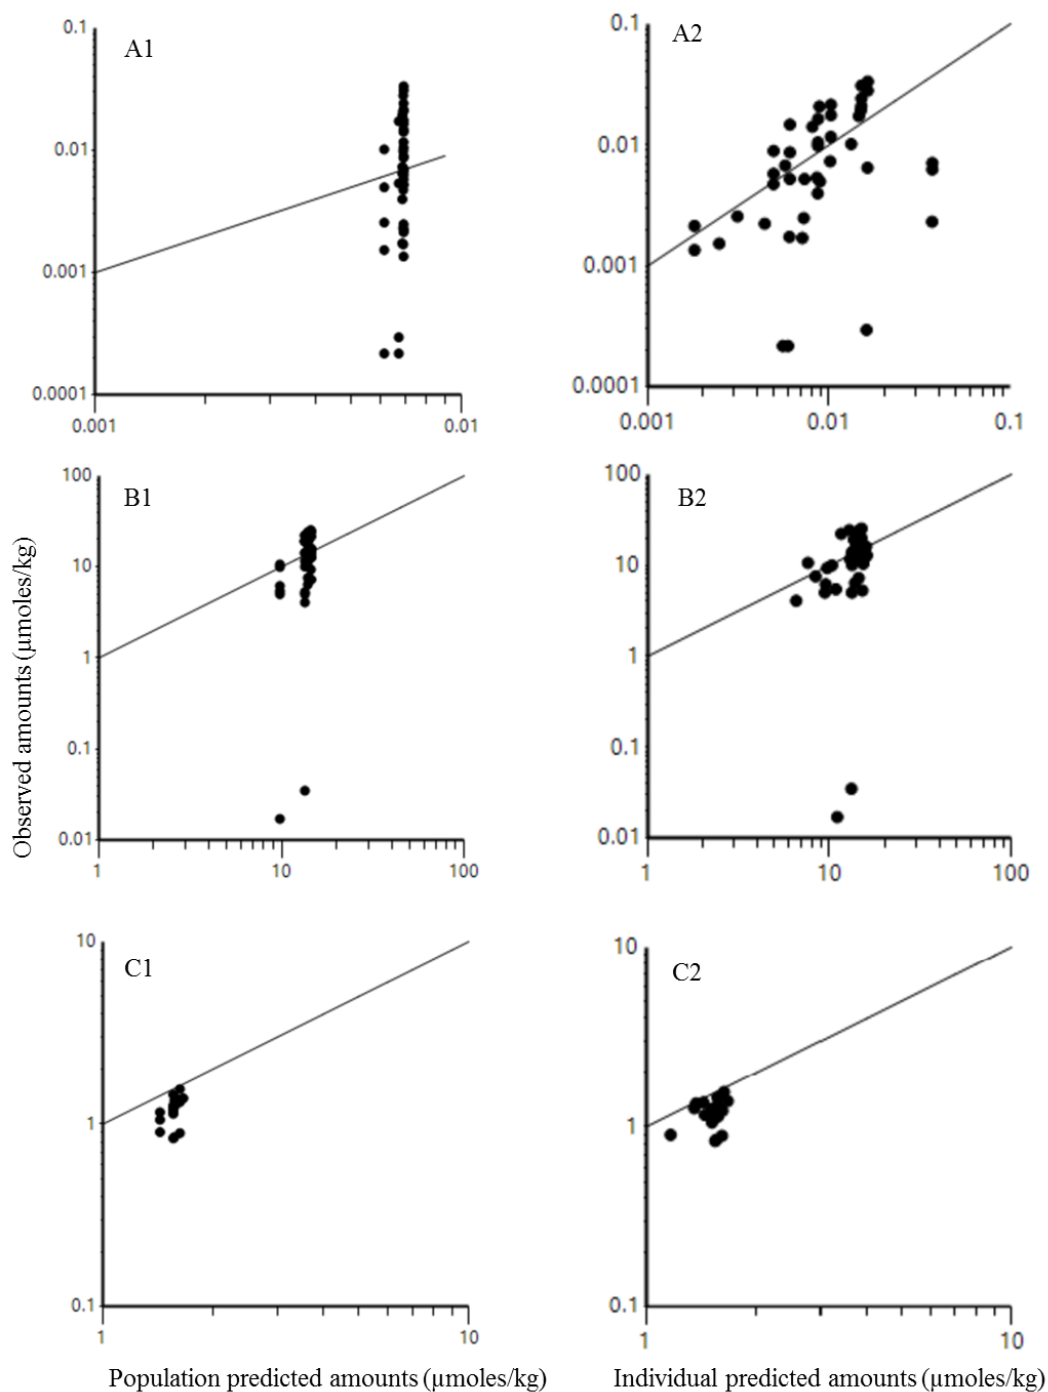

**Figure S4: Diagnostic plots of the population and individual model predicted vs observed cumulative amounts of BPS and BPSG excreted in urine after IV dosing.** A1 and B1: Population predicted vs. observed cumulative amounts ( $\mu\text{moles/kg}$ ) of BPS (A1) and BPSG (B1) excreted in urine after BPS IV administration; C1: Population predicted vs. observed cumulative amounts ( $\mu\text{moles/kg}$ ) of BPSG excreted in urine after BPSG IV administration; A2 and B2: Individual predicted vs. observed cumulative amounts ( $\mu\text{moles/kg}$ ) of BPS (A2) and BPSG (B2) excreted in urine after BPS IV administration; C2: Individual predicted vs. observed cumulative amounts ( $\mu\text{moles/kg}$ ) of BPSG excreted in urine after IV BPSG administration.

BPS: Bisphenol S; BPSG: Bisphenol S glucuronide; IV: Intravenous.

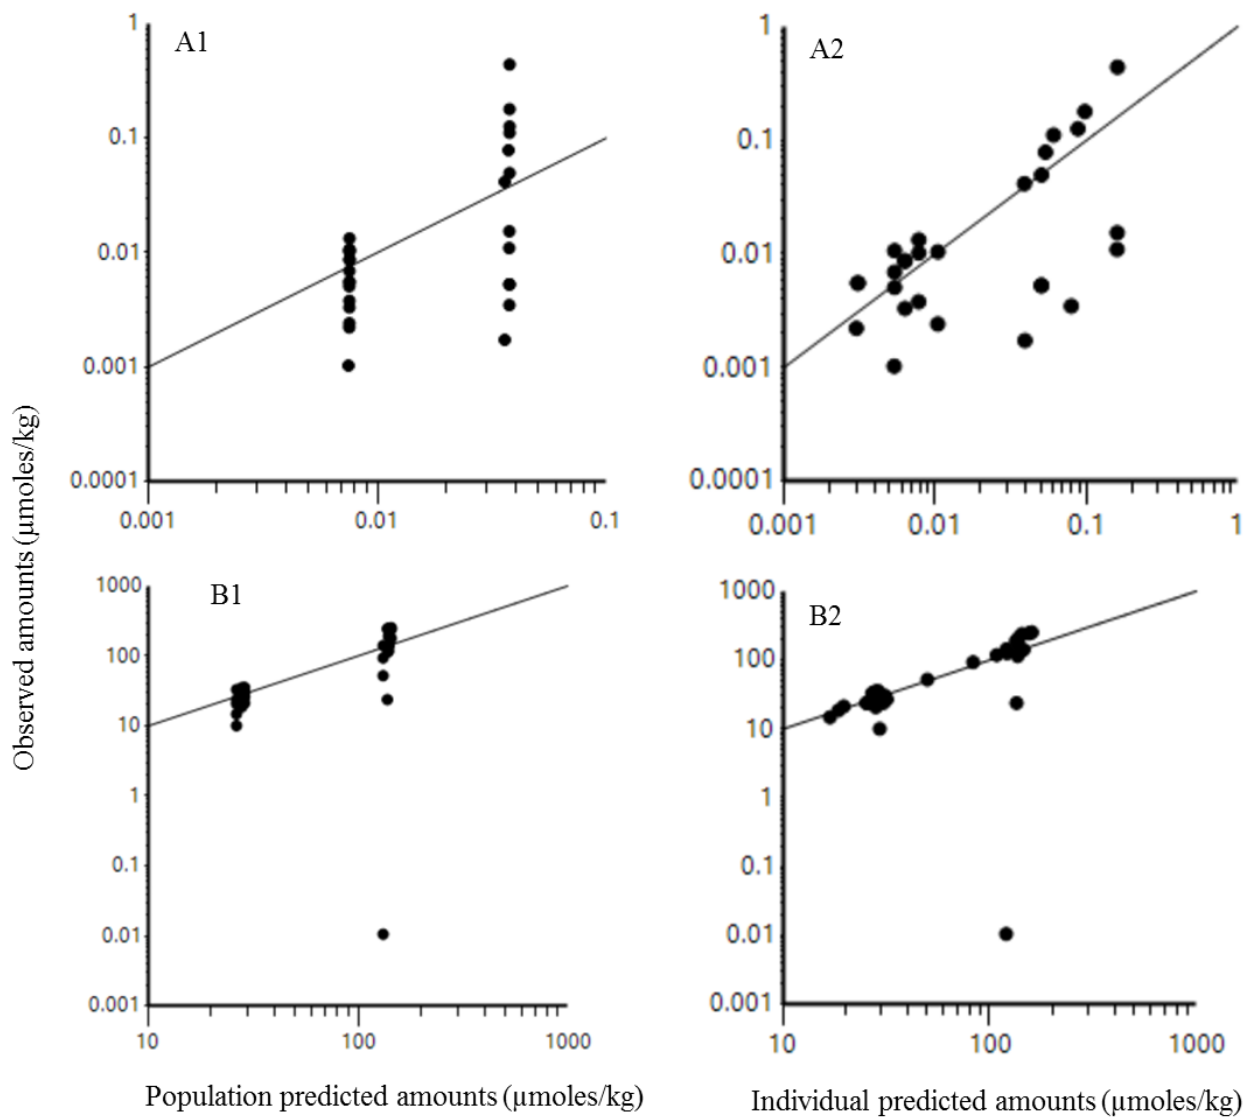

**Figure S5: Diagnostic plots of the population and individual model predicted vs observed cumulative amounts of BPS and BPSG excreted in urine after oral dosing.** A1 and B1: Population predicted vs. observed cumulative amounts ( $\mu\text{moles/kg}$ ) of BPS (A1) and BPSG (B1) excreted in urine after BPS oral administration; A2 and B2: Individual predicted vs. observed cumulative amounts ( $\mu\text{moles/kg}$ ) of BPS (A2) and BPSG (B2) excreted in urine after BPS oral administration.

BPS: Bisphenol S; BPSG: Bisphenol S glucuronide.

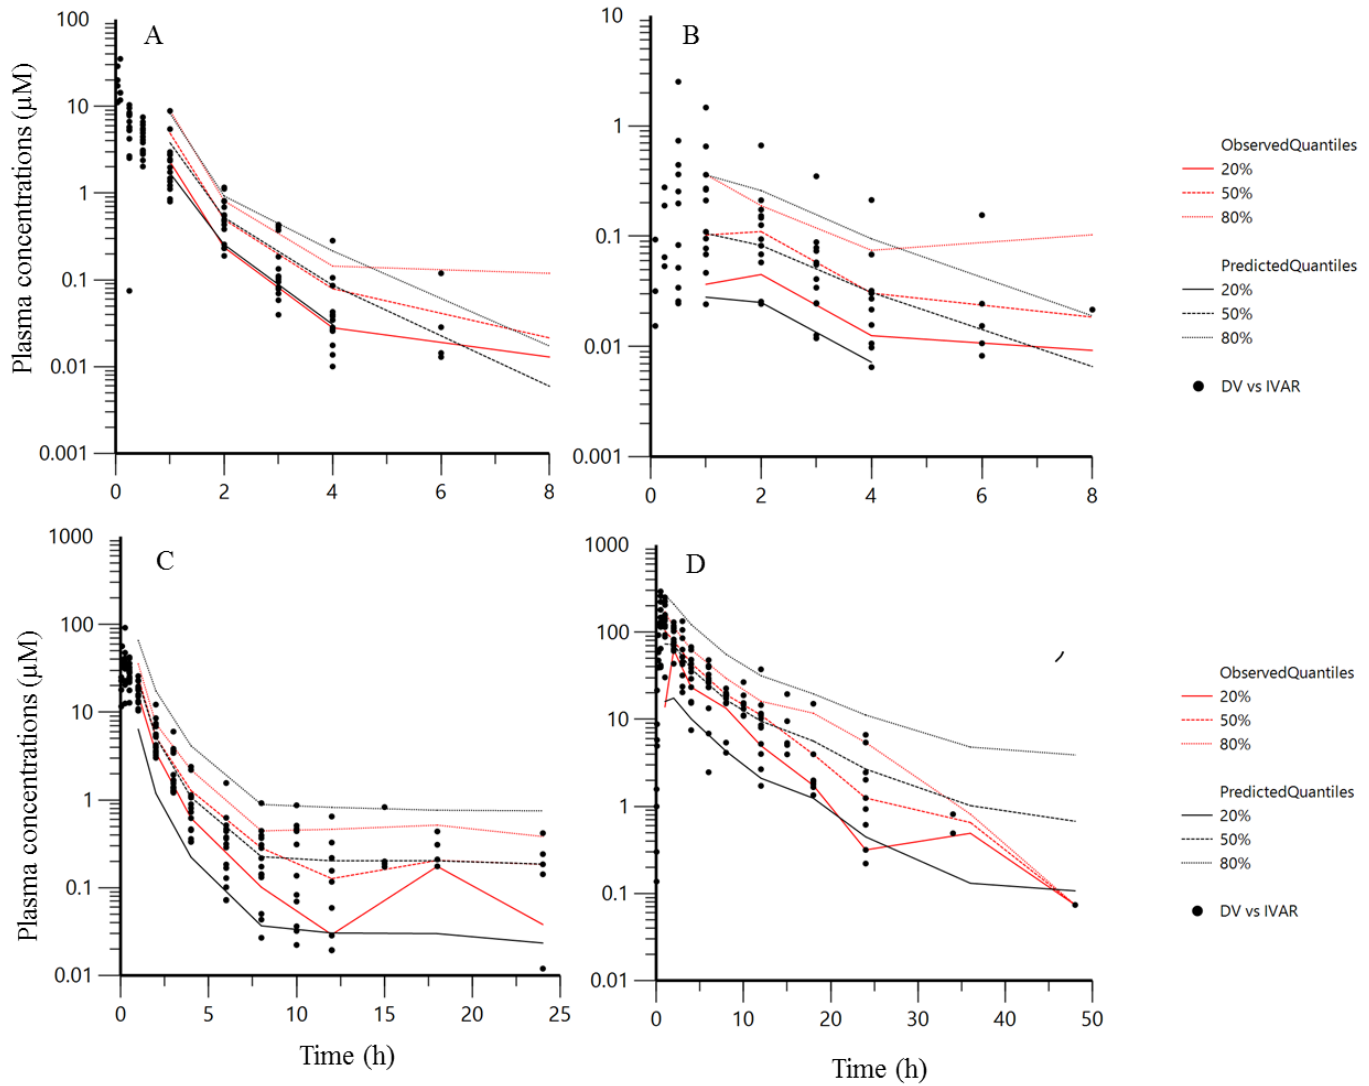

**Figure S6: Visual Predictive Check (VPC) of plasma BPA and BPAG concentrations obtained with 200 replicates of each animal.** A and B: Plasma BPA concentrations ( $\mu\text{M}$ ) after respective BPA IV (A) and oral administrations. C and D: Plasma BPAG concentrations ( $\mu\text{M}$ ) after respective BPA IV (C) and oral administrations (D) Red lines: observed quantiles (20, 50 and 80%); Black lines: predicted quantiles by Monte Carlo Simulation (20, 50 and 80%); Black symbols: observed data. When the model ideally predicts the data, the observed and predicted quantiles are expected to be superimposed.  
 BPA: Bisphenol A; BPAG: Bisphenol A glucuronide; IV: Intravenous.

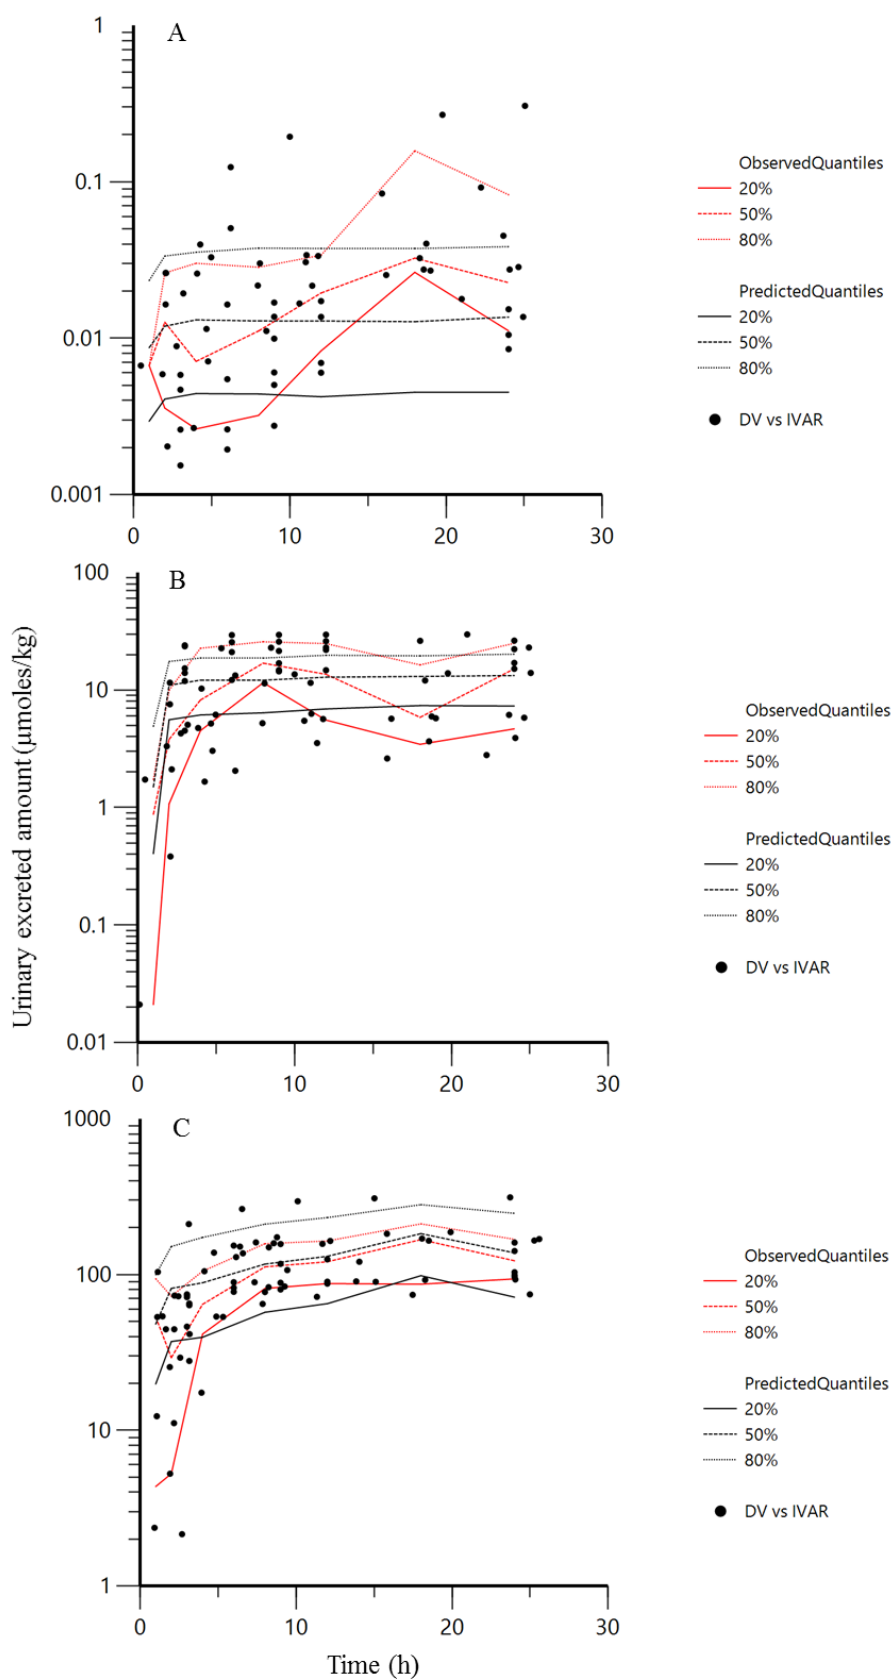

**Figure S7: Visual Predictive Check (VPC) of the amounts of BPA and BPAG excreted in urine obtained with 200 replicates of each animal.** A: Amounts of BPA excreted in urine ( $\mu\text{M}$ ) after BPA IV administration; B and C: Amounts of BPAG excreted in urine ( $\mu\text{M}$ ) after respective BPA IV and oral administrations. Red lines: observed quantiles (20, 50 and 80%); Black lines:

predicted quantiles by Monte Carlo Simulation (20, 50 and 80%); Black symbols: observed data. When the model ideally predicts the data, the observed and predicted quantiles are expected to be superimposed.

BPA: Bisphenol A; BPAG: Bisphenol A glucuronide; IV: Intravenous.

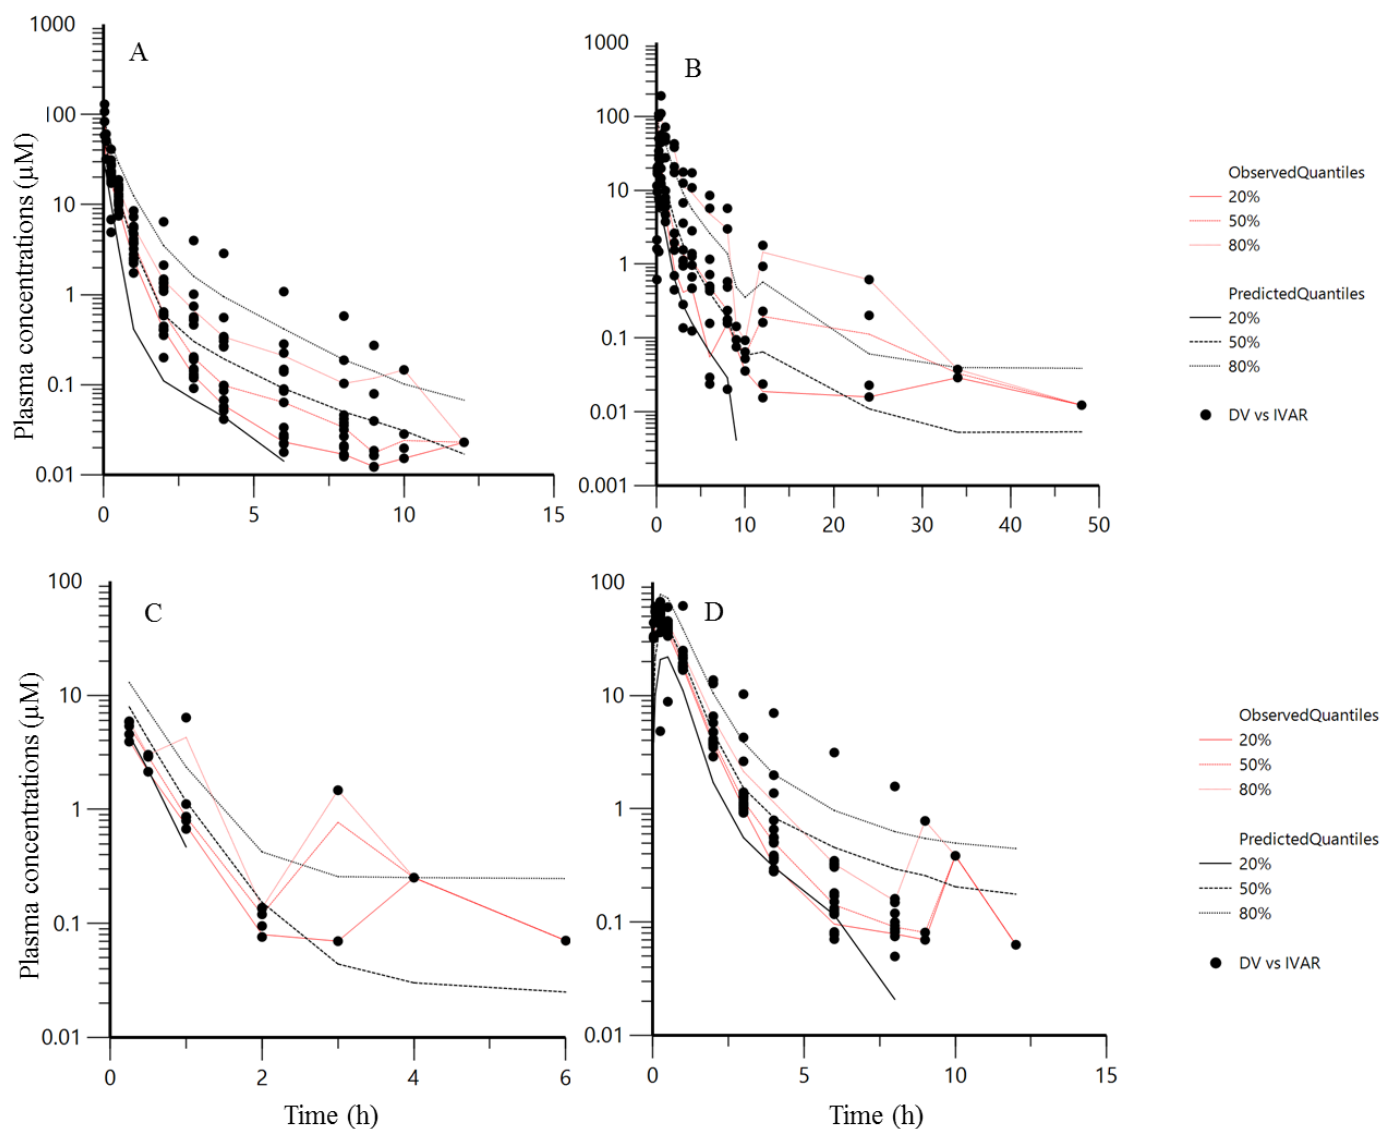

**Figure S8: Visual Predictive Check (VPC) of plasma BPS and BPSG concentrations obtained with 1000 replicates of each animal.** A and B: Plasma BPS concentrations ( $\mu\text{M}$ ) after respective BPS IV (A) and oral administrations. C and D: Plasma BPSG concentrations ( $\mu\text{M}$ ) after respective IV BPSG (C) and BPS administrations (D). Red lines: observed quantiles (20, 50 and 80%); Black lines: predicted quantiles by Monte Carlo Simulation (20, 50 and 80%); Black symbols: observed data. When the model ideally predicts the data, the observed and predicted quantiles are expected to be superimposed.

BPS: Bisphenol S; BPSG: Bisphenol S glucuronide; IV: Intravenous.



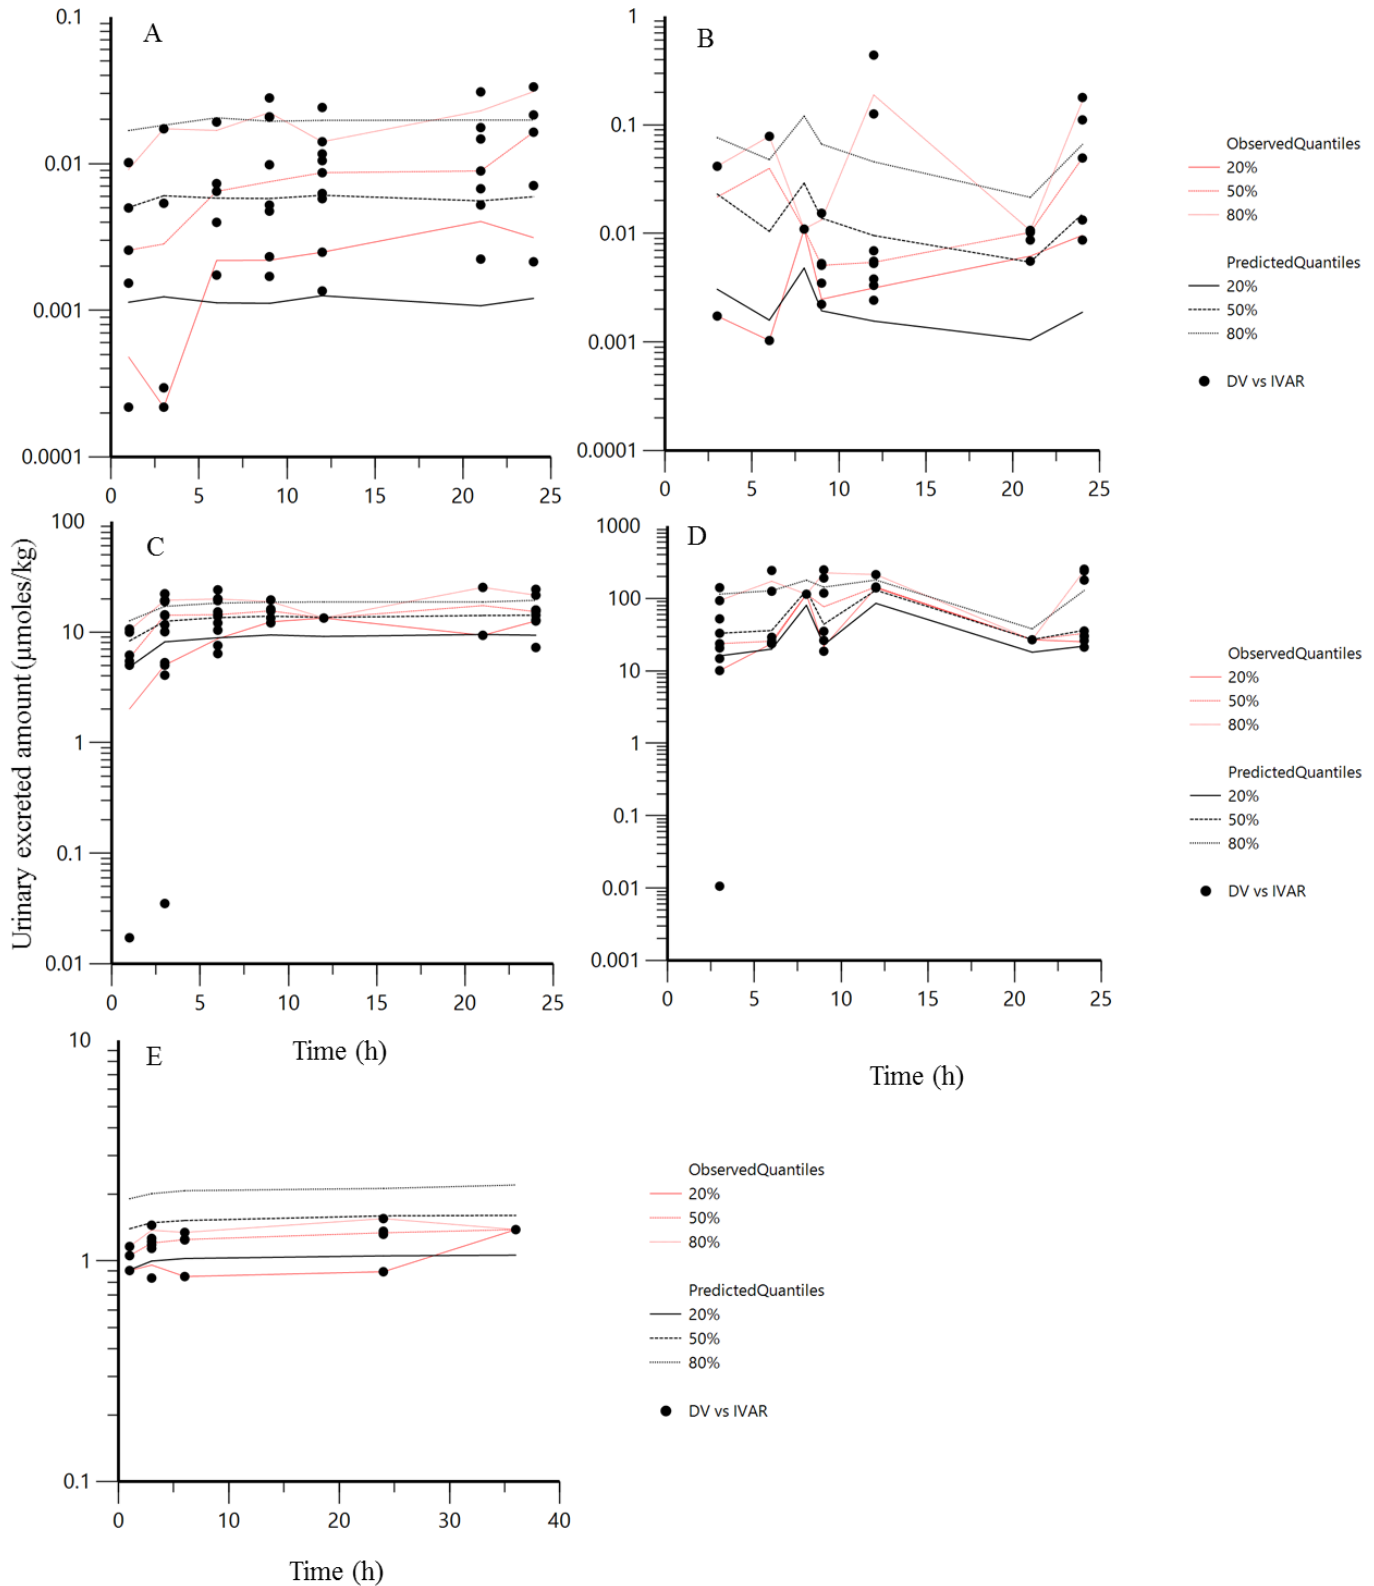

**Figure S9: Visual Predictive Check (VPC) of the amounts of BPS and BPSG excreted in urine obtained with 1000 replicates of each animal.** A and B: Amounts of BPS excreted in urine (µM) after respective BPS IV (A) and oral (B) administrations; C and D: Amounts of BPSG excreted in urine (µM) after respective BPS IV (C) and oral (D) administrations. E: Amounts of BPSG excreted in urine (µM) after BPSG IV administration. Red lines: observed quantiles (20, 50 and 80%); Black lines: predicted quantiles by Monte Carlo Simulation (20, 50 and 80%); Black symbols: observed data. When the model ideally predicts the data, the observed and predicted quantiles are expected to be superimposed. BPS: Bisphenol S; BPSG: Bisphenol S glucuronide; IV: Intravenous.
